# Supplementary material
Source: PubMed Central journal article supplement (PMC9474695)
Supplement: NIHMS1821602-supplement-Supinfo.pdf [file NIHMS1821602-supplement-Supinfo.pdf]

**Supplementary Figure 1**

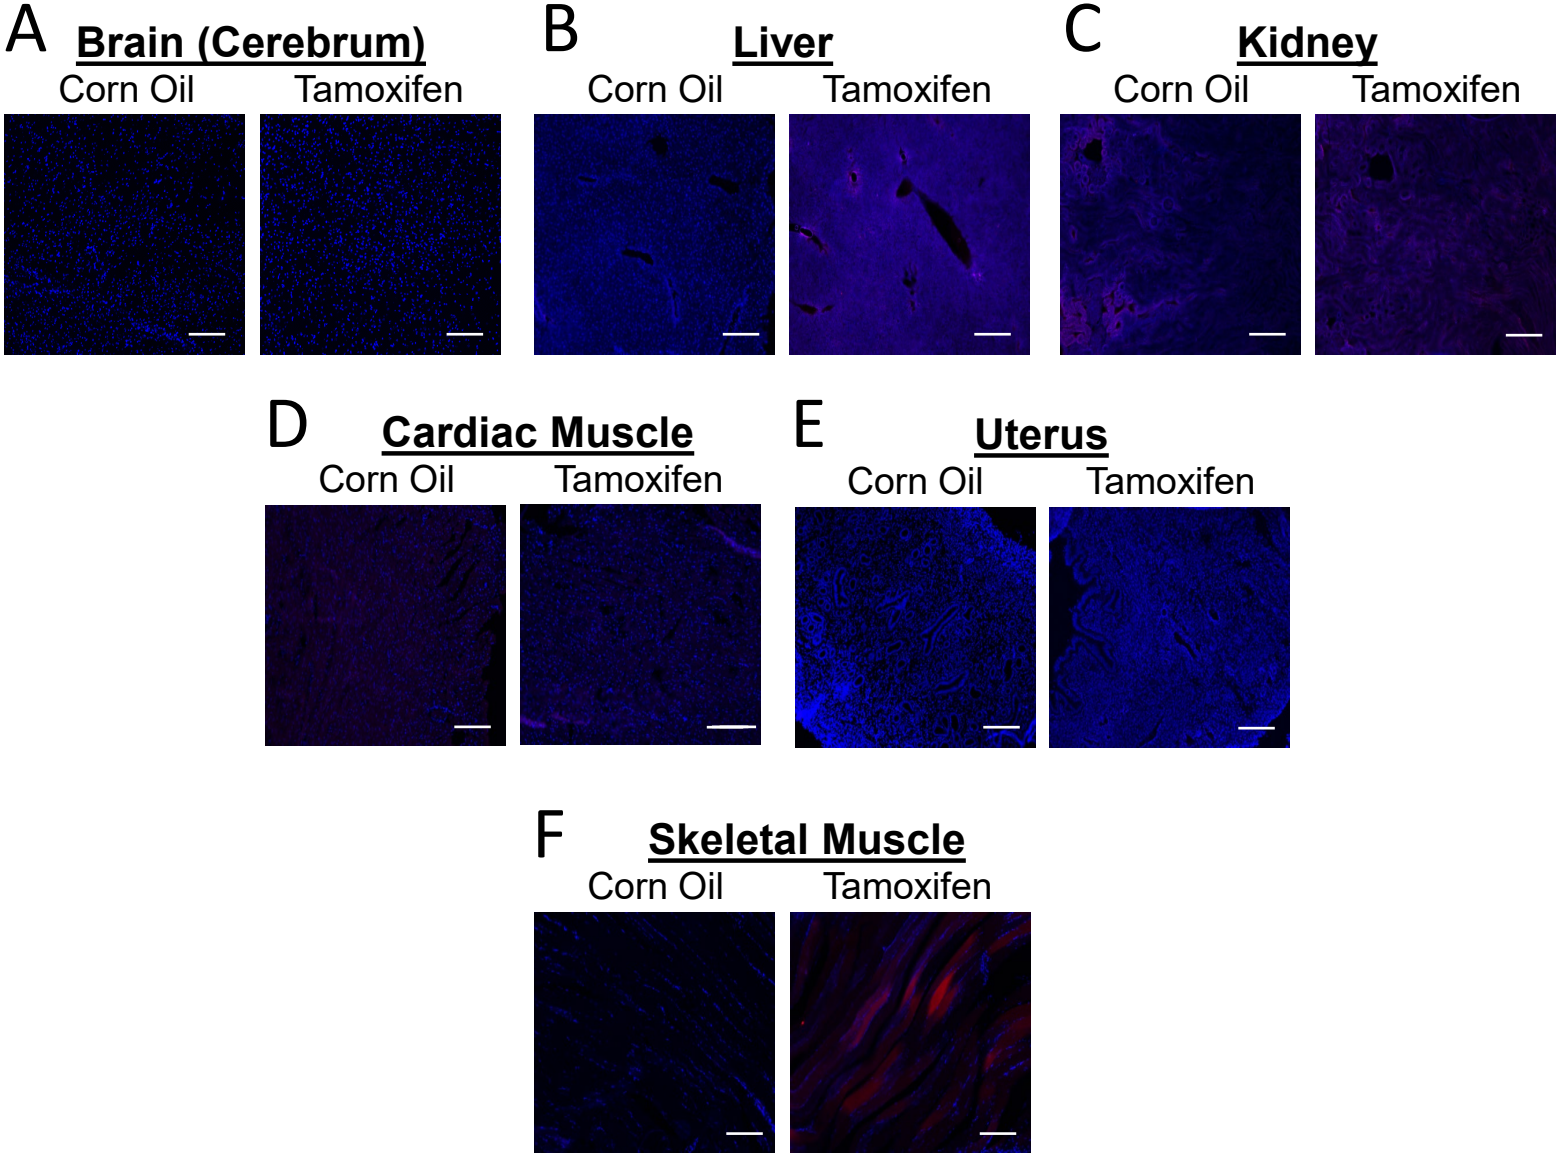

# Supplementary Figure 2

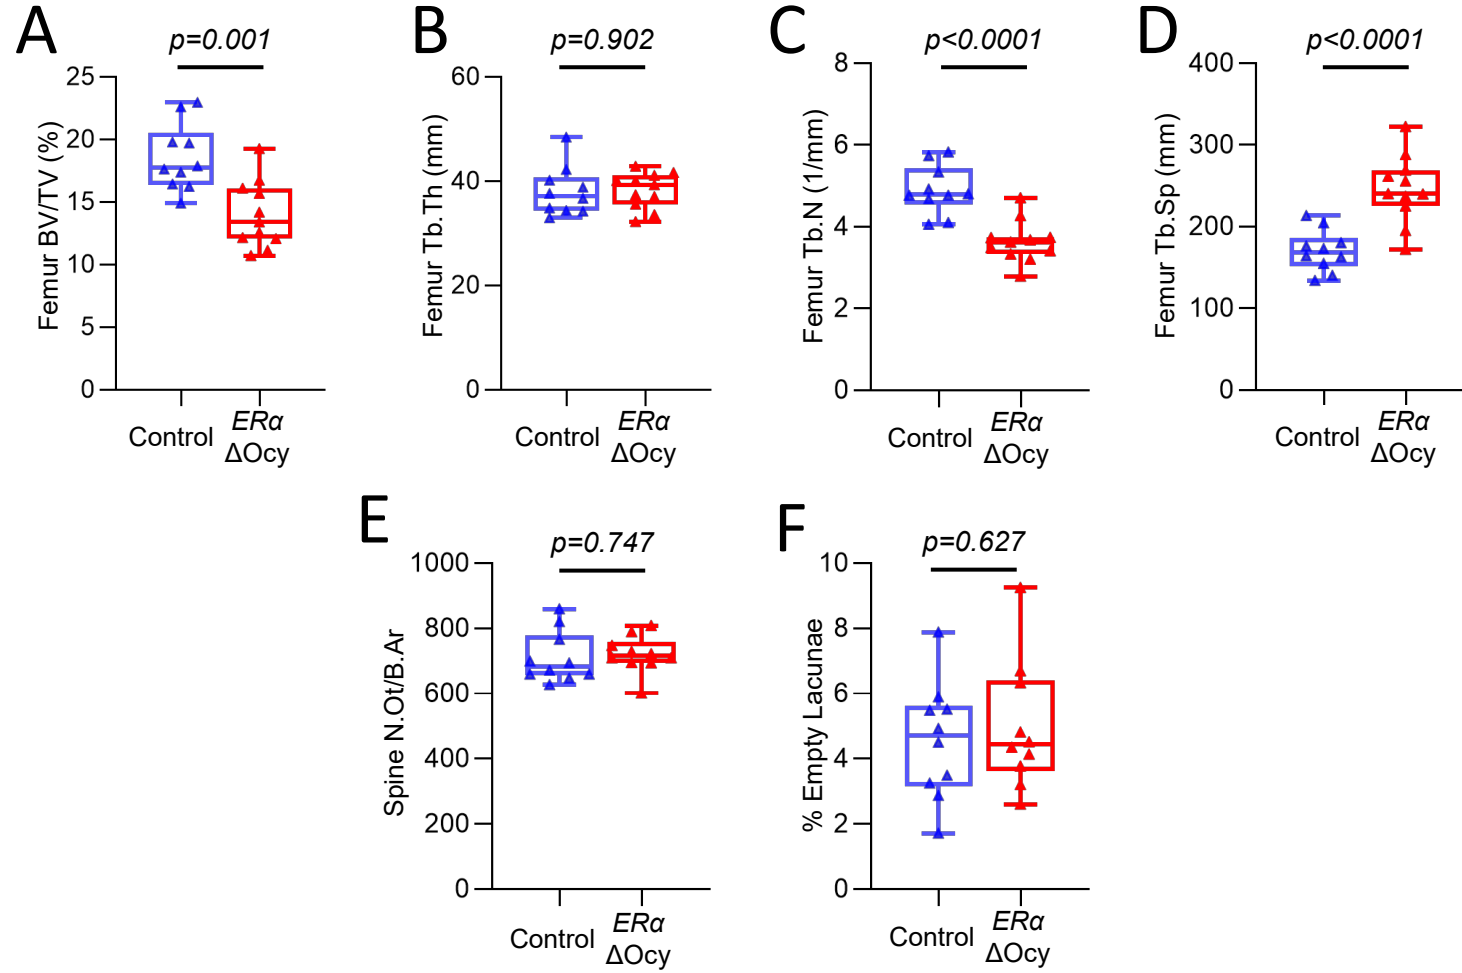

# Supplementary Figure 3

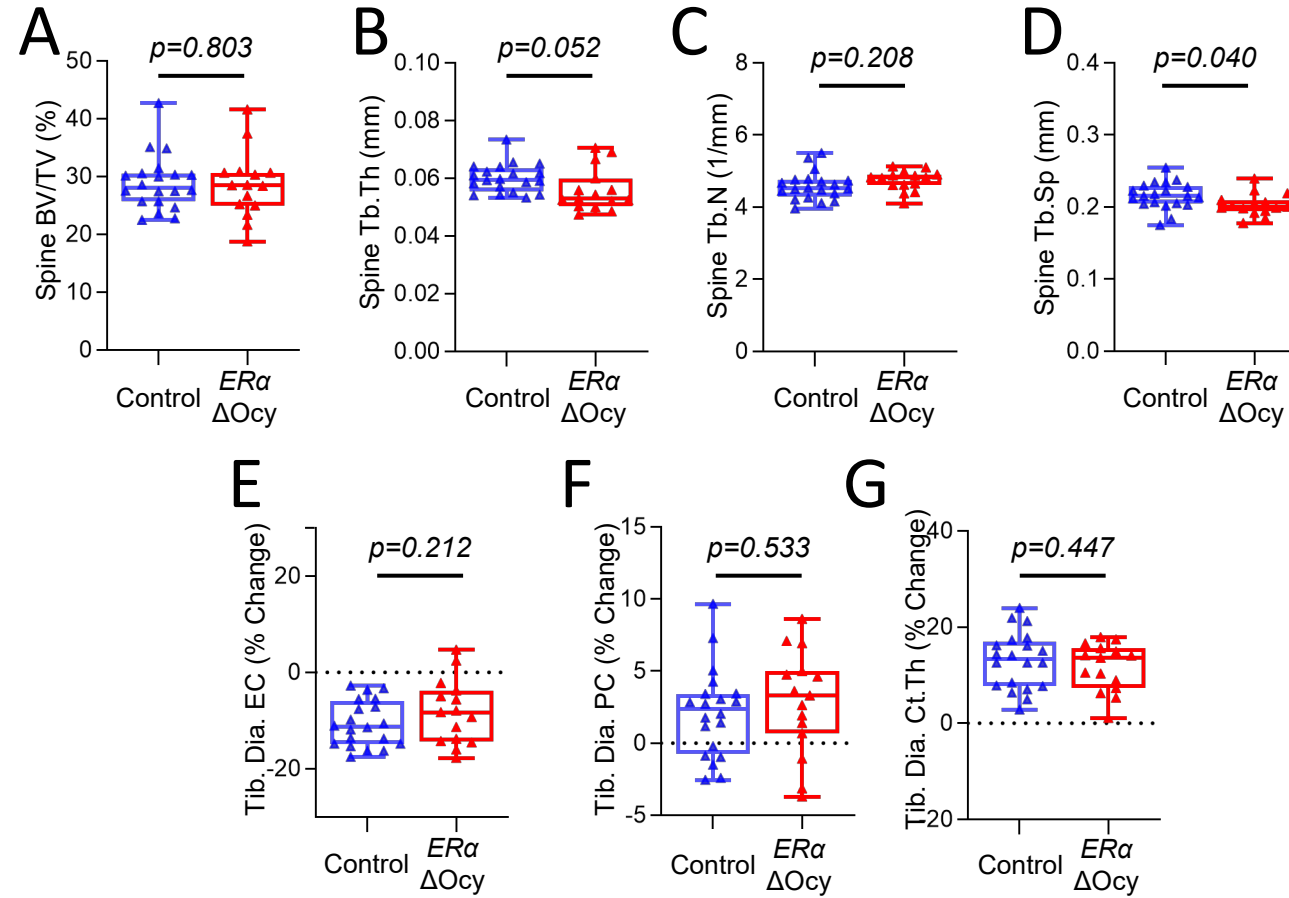

# Supplementary Figure 4

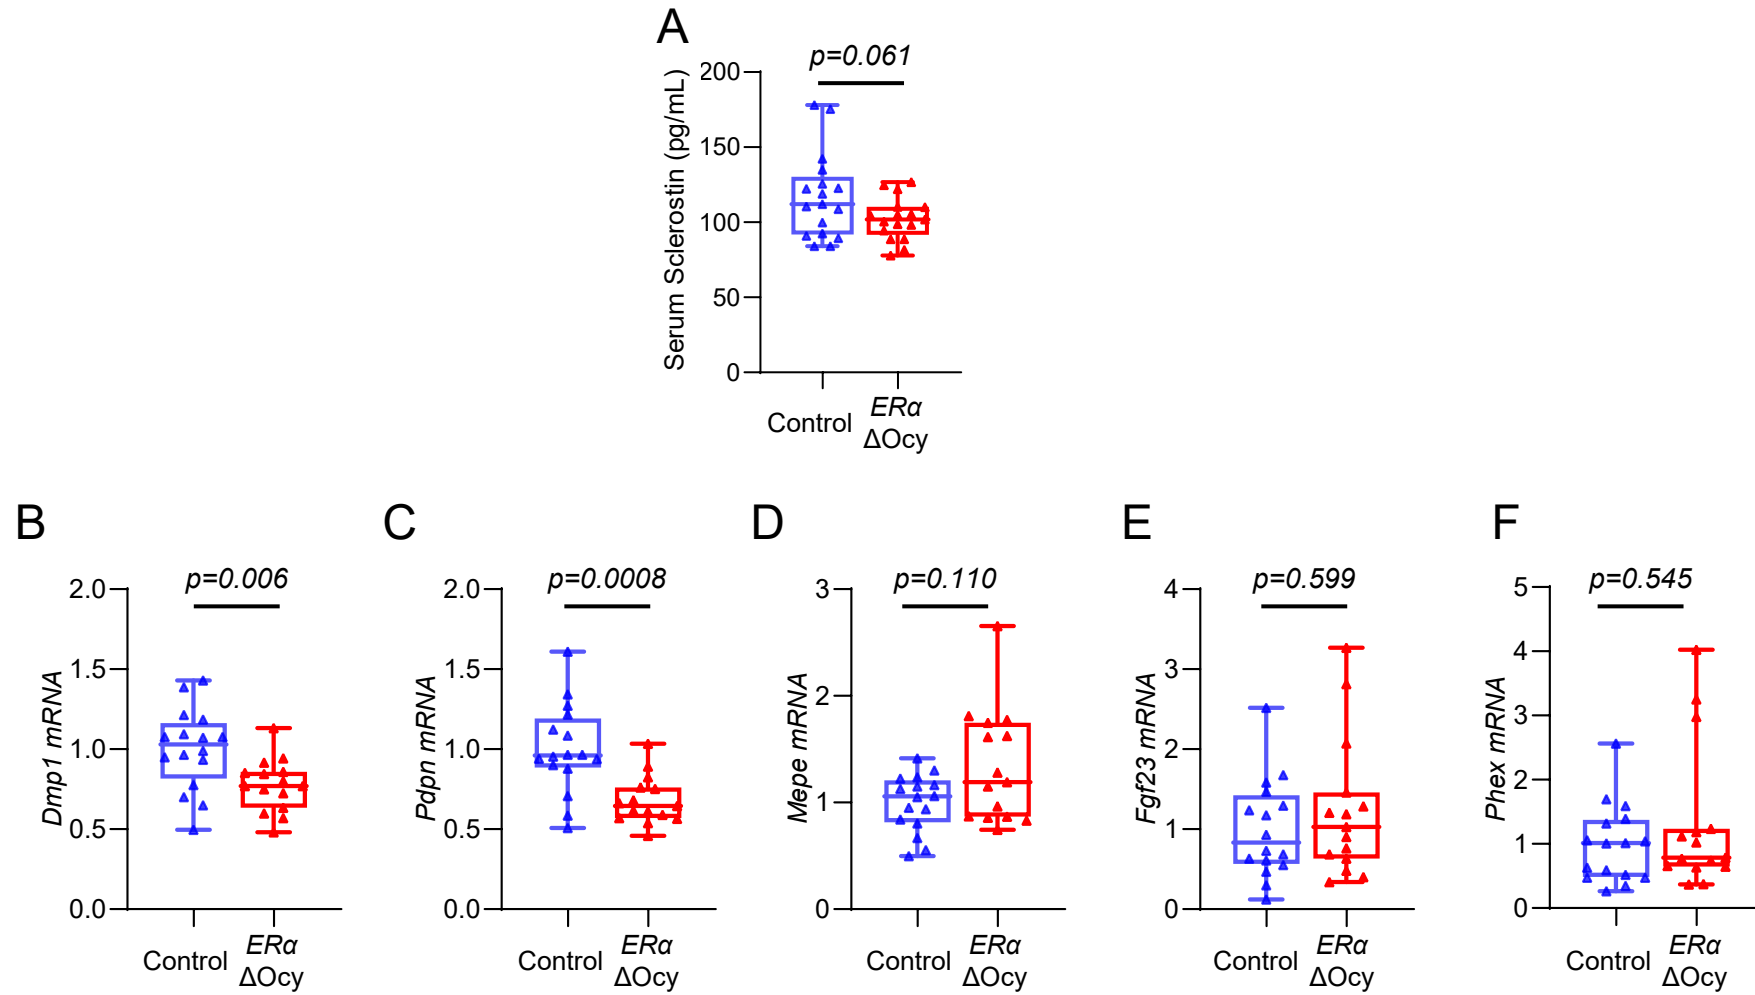

# Supplementary Figure 5

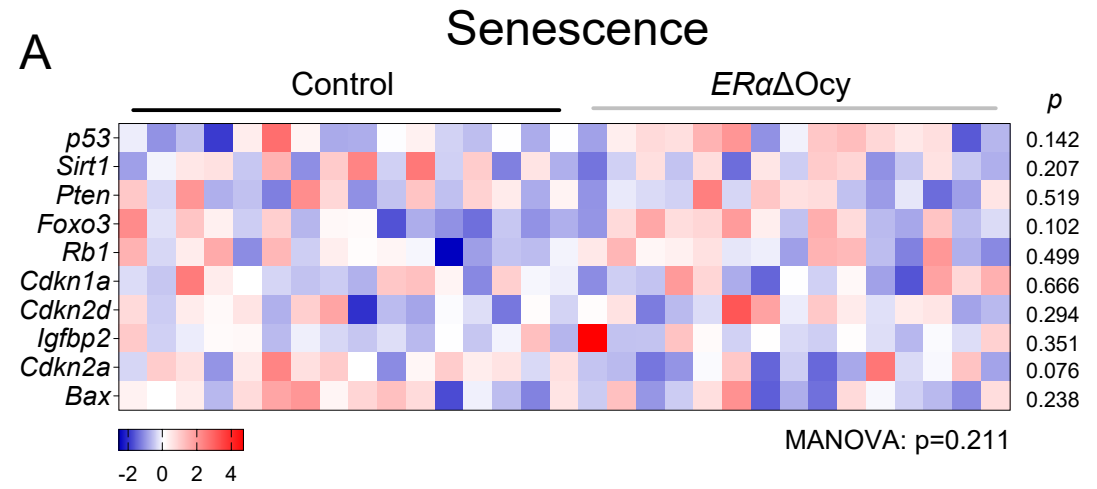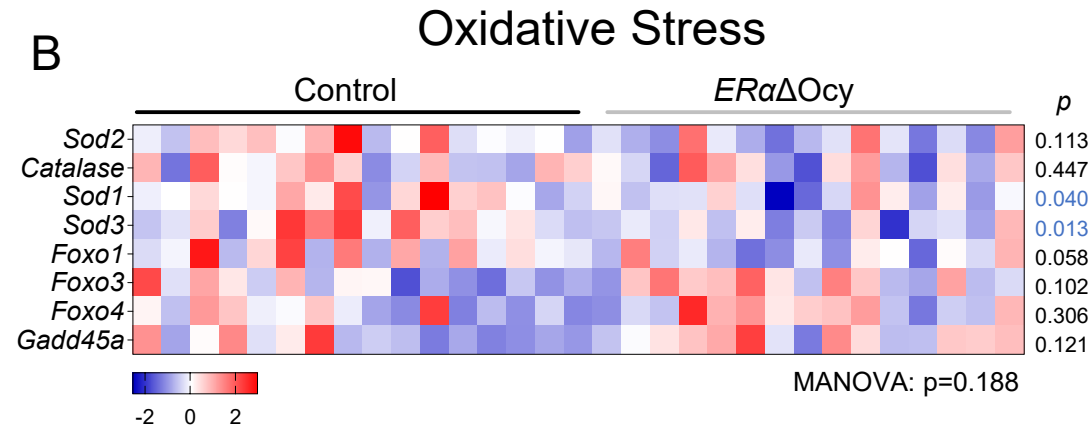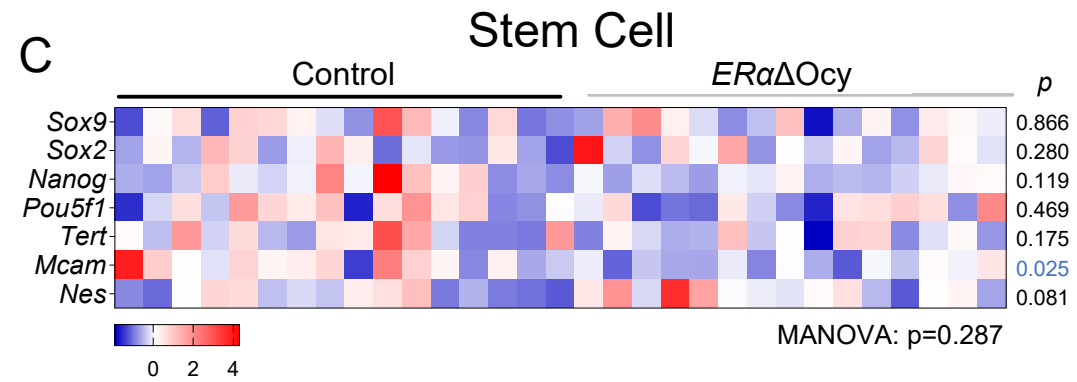

1 **Supplementary Figure Legends**

2 Supplementary Figure 1. Expression of *Dmp1*<sup>CreERT2</sup> in soft tissues. (A-F) Representative images  
3 of induced *TdTomato* expression in various soft tissues of corn oil- versus tamoxifen-treated  
4 *Dmp1*<sup>CreERT2</sup> *x* *TdTomato* mice. Scale bars = 10µm (10X magnification).

5  
6 Supplementary Figure 2. ERα deletion in osteocytes reduces femoral trabecular bone mass in  
7 female mice, with no significant effect on osteocyte numbers. (A-D) Histological analyses of  
8 trabecular bone at the femur metaphysis describing BV/TV, Tb.Th, Tb.N, and Tb.Sp. Osteocyte  
9 number per bone area (N.Ot/B.Ar) (E) and % empty lacunae (F) measured histologically at the  
10 lumbar spine. n=10-11 mice per group. Boxes represent median and interquartile range and  
11 whiskers represent minimum and maximum values. Datasets analyzed by unpaired t-test.

12  
13 Supplementary Figure 3. ERα deletion in osteocytes does not significantly alter bone mass in adult  
14 male mice. (A-D) Micro-CT analyses of trabecular bone at the lumbar spine describing BV/TV,  
15 Tb.Th, Tb.N, and Tb.Sp. (E-G) Longitudinal Tib. Dia. micro-CT analyses of cortical bone showing  
16 % change between baseline and endpoint describing EC, PC, and Ct.Th. n=15-20 mice per group.  
17 Boxes represent median and interquartile range and whiskers represent minimum and maximum  
18 values. Datasets analyzed by unpaired t-test.

19  
20 Supplementary Figure 4. (A) Serum sclerostin levels in the Control and *ERαΔOcy* mice. (B-F)  
21 Osteocyte genes and their expression in Control and *ERαΔOcy* mice. (B) *Dmp1* is significantly  
22 reduced in the *ERαΔOcy* mice, as is (C) *Pdpr*, while neither *Mepe* (D), *Fgf23* (E) or *Phex* (F) are

23 significantly altered. Boxes represent median and interquartile range and whiskers represent  
24 minimum and maximum values. Datasets analyzed by Mann-Whitney test.

25

26 Supplemental Figure 5. *ERαΔOcy* mice do not exhibit disrupted gene expression in stress or stem  
27 cell signaling pathways. (A-C) Heatmap of mRNA expression changes in (A) senescence, (B)  
28 oxidative stress, and (C) stem cell signaling pathways from spines of tamoxifen-treated Control  
29 and *ERαΔOcy* mice by qRT-PCR. Datasets analyzed by MANOVA, with pathway-level  
30 significance-values listed below each heatmap and individual gene p-values beside each row; blue  
31 font indicates significantly downregulated gene in the *ERαΔOcy* mice

32

33

**Supplementary Table 1.** Primers used for qRT-PCR analyses. Each primer shows forward and reverse sequences, along with the assigned pathway for the MANOVA analyses.

| <b>Pathway</b>  | <b>Gene</b>            | <b>Forward Primer Sequence</b> | <b>Reverse Primer Sequence</b> |
|-----------------|------------------------|--------------------------------|--------------------------------|
| Osteoblast      | <i>Bglap</i>           | CCTGAGTCTGACAAAGCCTTCA         | GCCGGAGTCTGTTCACCTACCTT        |
|                 | <i>Runx2</i>           | GGCACAGACAGAAGCTTGATGA         | GAATGCGCCCTAAATCACTGA          |
|                 | <i>Spp1</i>            | CCCGGTGAAAGTGACTGATTCT         | GATCTGGGTGCAGGCTGTAAA          |
|                 | <i>Col1a1</i>          | GCTTCACCTACAGCACCTTGT          | TGACTGTCTTGCCCCAAGTTC          |
|                 | <i>Col1a2</i>          | TTGCTGCTTGCAGTAACTTCGT         | TTTCGTA CTGATCCCGATTGC         |
|                 | <i>Ibsp</i>            | CCAAGAAGGCTGGAGATGCA           | TTCCTCGTCGCTTTCCTTCA           |
|                 | <i>Alpl</i>            | CACAGATTCCCAAAGCACCT           | GGGATGGAGGAGAGAAGGTC           |
|                 | <i>Sparc</i>           | GAGGAGGTGGTGGCTGACAA           | CACCTTGCCATGTTTGCAAT           |
|                 | <i>Sp7</i>             | AAGTTCACCTGCCTGCTCTGTT         | TGCGCTGATGTTTGCTCAAG           |
| Wnt Signaling   | <i>Ccnd1</i>           | AGAAGGAGATTGTGCCATCCAT         | CTCACAGACCTCCAGCATCCA          |
|                 | <i>Postn</i>           | TCCCGACTTCAGGCTGATTAA          | ATGACTGGCTCTCCGTGGAT           |
|                 | <i>Lef1</i>            | CTGGCAAGGTCAGCCTGTTTA          | GTGTGCGCTGACAGTGAGGAT          |
|                 | <i>Axin2</i>           | CGCCACCAAGACCTACATACG          | ACATGACCGAGCCGATCTGT           |
|                 | <i>Cyr61</i>           | CAGCTCACTGAAGAGGCTTCT          | GCGTGCAGAGGGTTGAAAAG           |
|                 | <i>Ephb4</i>           | CCTCGCCACTGCTTTAGAAGAG         | ATTTGAGATCCGCCGTTTCC           |
|                 | <i>Gja1</i>            | ACAAGTCCTTCCCCATCTCTCA         | GGGCACAGACACGAATATGATC         |
|                 | <i>Tcf7</i>            | CGGTCAAGGGAAAAACATCAA          | CGGGTAAGTACCGAATGCATTT         |
|                 | <i>Vcan</i>            | ATGCGCTTCTTGCTGGCTAT           | TTCATCGTTGGGAGTCACA            |
|                 | <i>Fosl1</i>           | CCGAAGAAAGGAGCTGACAGA          | CCGATTTCTCATCTCCAATTT          |
|                 | <i>Tnfrsf11b (Opg)</i> | CCAAGAGCCCAGTGTTTCTT           | CCAAGCCAGCCATTGTTAAT           |
| BMP Signaling   | <i>Hes1</i>            | AACACGACACCGGACAAACC           | TTCGCCTCTTCTCCATGATAGG         |
|                 | <i>Id2</i>             | CCCAGAACAAGAAGGTGACCAA         | TGCAGGTCCAAGATGTAATCGA         |
|                 | <i>Klf10</i>           | TTCAGACAGTCCCAGCATTTTG         | TGGGAGGGTTTGAAGTCAGA           |
|                 | <i>Id1</i>             | AGATCCTGCAGCATGTAATCGA         | CCCGACTTCAGACTCCGAGTT          |
|                 | <i>JunB</i>            | AGTGCTGCCGGTCTCCTAAG           | CTTGACCCCTAGCAGCAACTG          |
|                 | <i>Smad6</i>           | GCCACTGGATCTGTCCGATT           | GAGCAGTGATGAGGGAGTTGGT         |
|                 | <i>Zeb1</i>            | CACAGTGGAGAGAAGCCATACG         | GGAGCCAGAATGGGAAAACC           |
|                 | <i>Sox4</i>            | GGGCAGTTTCAGTCTCTCATC          | GCCGGGTTTGAAGTTAAAATC          |
|                 | <i>Lox</i>             | ACCTGCTTGATGCCAACACA           | CTCCAGACAGAAGCTTGCTTTG         |
|                 | <i>Smad7</i>           | TTTGCCTCGGACAGCTCAAT           | GATCTTGCTCCGCACTTTCTG          |
| Notch Signaling | <i>Jag1</i>            | CTGTGTGGATGAGATCAATGG          | TATGTCTGGAGGGCAGATAC           |
|                 | <i>Notch1</i>          | CGCAAGAGGCTTGAGATGCT           | CCACTTCGCACCTACCTCCAT          |
|                 | <i>Hey1</i>            | CACTGCAGGAGGGAAAGGTTAT         | CCCCAACTCCGATAGTCCAT           |
|                 | <i>Hes1</i>            | AACACGACACCGGACAAACC           | TTCGCCTCTTCTCCATGATAGG         |
|                 | <i>Notch2</i>          | CAGTCTGAAGCACACCCCAAT          | GGCATGGTGCTCTTGGTGTT           |
|                 | <i>Hey2</i>            | GTGCGCCTTGCTCTCATCTC           | GCCATGGAGGATGTCATCACT          |
|                 | <i>HeyL</i>            | CCTGGTCCTTCTGCATAGC            | GATGGCGAGCTGACTGTTGAG          |
|                 | <i>Jag2</i>            | ATCAATGCTGAGCCTGACCAAT         | TCGCAGTTCTTGCCCAAGTA           |
| Proliferation   | <i>Ccnd1</i>           | AGAAGGAGATTGTGCCATCCAT         | CTCACAGACCTCCAGCATCCA          |
|                 | <i>E2F1</i>            | TGACCACCAAACGCTTCTTG           | GCTGCCAGTTCAGGTCAAC            |



|                   |                          |                        |                          |
|-------------------|--------------------------|------------------------|--------------------------|
|                   | <i>Ccne1</i>             | CGTCTAAGCCCTCTGACCATTG | CGTTGACATAGGCCACTTGG     |
|                   | <i>Ccnb1</i>             | CTCCCTGCTTCCTGTTATGCA  | GTGCTTTGTGAGGCCACAGTT    |
|                   | <i>Ccnb2</i>             | AAGCCGGAGAGGTGGATGTT   | GAGCGTCAGCTCCATCAGGTA    |
|                   | <i>Ccnc</i>              | CCCTTGCATGGAGGATAGTGAA | GAACGGAGGGTACAGCAGACA    |
|                   | <i>Mki67</i>             | AGACTGCCTCCCAGGAGACA   | GGCCCCGAGATGTAGATTTCT    |
|                   | <i>Ccna2</i>             | GAAGAGGCAGCCAGACATCAC  | CTCAACCAGCCAGTCCACAA     |
| Apoptosis         | <i>Bad</i>               | GCAGGCACTGCAACACAGAT   | TCCCACCAGGACTGGATAATG    |
|                   | <i>Bax</i>               | CGGCGAATTGGAGATGAACT   | GTCCACGTCAGCAATCATCCT    |
|                   | <i>Bcl2</i>              | CGGGAGATCGTGATGAAGTACA | ATCTCCAGCATCCCCTCGTA     |
|                   | <i>Bcl2l1</i>            | AGGCCCCAGAAGAACTGAAG   | AGGATGGGTTGCCATTGATG     |
|                   | <i>Birc5</i>             | CCGAGAACGAGCCTGATTTG   | GTTCCAGCCTTCCAATTCC      |
|                   | <i>Casp8</i>             | GCCACCTTCAGTTTTGGATGA  | CTCTTGCGAGTCACACAGTTC    |
|                   | <i>Casp3</i>             | TGCACATTCTACTCGCGTTA   | TCCAGGGAGAAGGACTCGAA     |
|                   | <i>Fasf</i>              | CCGCTCTGATCTCTGGAGTGA  | CACGAAGTACAACCCAGTTTCG   |
|                   | <i>Fas</i>               | CTGCACCCTGACCCAGAATAC  | ACAGCCAGGAGAATCGCAGTA    |
| Senescence        | <i>Trp53 (p53)</i>       | TCTTATCCGGGTGGAAGGAAA  | GGCGAAAAGTCTGCCTGTCTT    |
|                   | <i>Sirt1</i>             | GCAGGTTGCAGGAATCCAAA   | GGCAAGATGCTGTTGCAAAG     |
|                   | <i>Pten</i>              | CCCAGTCAGAGGCGCTATGTA  | GTGCCACGGGTCTGTAATCC     |
|                   | <i>Foxo3</i>             | CAACCGGCTCCTTCAACAGTA  | GGTGACTIONGACGCAAGGAGTTC |
|                   | <i>Rb1</i>               | AAACAGCTGCAATCCCCATTA  | GCGCTCCTGTTCTGACCTCTT    |
|                   | <i>Cdkn1a (p21)</i>      | GAACATCTCAGGGCCGAAAA   | TGCGCTTGAGGTGATAGAAATC   |
|                   | <i>Cdkn2d (p19)</i>      | GCGATAAGAGAGGGCCATAGC  | CCTGTGGTGGAGATCAGATTCA   |
|                   | <i>Igfbp2</i>            | GCCCCCTGGAACATCTCTACT  | GTTGTACCGGCCATGCTTGT     |
|                   | <i>Cdkn2a-p16ink4a</i>   | GAACTCTTTCGGTTCGTACCC  | AGTTTGAATCTGCACCGTAGT    |
|                   | <i>Bax</i>               | CGGCGAATTGGAGATGAACT   | GTCCACGTCAGCAATCATCCT    |
| Oxidative Stress  | <i>Sod2</i>              | CCCAGACCTGCCTTACGACTAT | CTGCATGATCTGCGCGTTAA     |
|                   | <i>Catalase</i>          | GGTGCGGACATTCTACACAAAG | TGTTCTCACACAGGCGTTTCC    |
|                   | <i>Sod1</i>              | GTTGGAGACCTGGGCAATGT   | CACACGATCTTCAATGGACACA   |
|                   | <i>Sod3</i>              | CCTTCTTGTCTACGGCTTGCT  | AGCTGGACTCCCCTGGATTT     |
|                   | <i>Foxo1</i>             | TTCTCTCGTCCCCAACATCTTT | AATAGCATGGTGTCTGCTGCAT   |
|                   | <i>Foxo3</i>             | CAACCGGCTCCTTCAACAGTA  | GGTGACTIONGACGCAAGGAGTTC |
|                   | <i>Foxo4</i>             | CCACGAAGCAGTTCAAATGCT  | TTCAGACTCCGGCCTCATTG     |
|                   | <i>Gadd45a</i>           | GGACTCGCACTTGCAATATGAC | GTGTCCATCCTTTCGGTCTTCT   |
| Stemness          | <i>Sox9</i>              | GCGTGACGACAAAGAAAGAC   | TCCGTTCTTCACCGACTTCCCT   |
|                   | <i>Sox2</i>              | GCACAACCTCGGAGATCAGCAA | CTCGGTCTCGGACAAAAGTTTC   |
|                   | <i>Nanog</i>             | AGTGGAGTATCCCAGCATCCA  | TCCAGATGCGTTACCAGATAG    |
|                   | <i>Pou5f1</i>            | GAGGAGTCCCAGGACATGAAAG | GCTTCAGCAGCTTGGCAAAC     |
|                   | <i>Tert</i>              | GGTCACATTGCAGGTTTCGA   | GGCTGGTGTTC AAGGCATCT    |
|                   | <i>Mcam</i>              | TGATTTTCCGTGTGCACCAA   | GGCTAAGGCGGTGCTCATATT    |
|                   | <i>Nes</i>               | AGGCGCTGGAACAGAGATTG   | TCCACAGCCAGCTGGAACCT     |
| Independently Run | <i>Cxcl12 (SDF-1)</i>    | GCCAACGTCAAGCATCTGAAA  | CAGCCGTGCAACAATCTGAA     |
|                   | <i>Sost (Sclerostin)</i> | ACTTGTGCACGCTGCCTTCT   | TGACCTCTGTGGCATCATTCC    |
|                   | <i>Sostdc1</i>           | CGTGCAAGTGCAAGAGGTACA  | GCGACACGCTTTC A AAGTTGT  |
|                   | <i>Tnfsf11 (Rankl)</i>   | GCTGGGACCTGCAAATAAGT   | TTGCACAGAAAACATTACACCTG  |

---

|              |               |                          |                         |
|--------------|---------------|--------------------------|-------------------------|
| Housekeeping | <i>Tbp</i>    | CTTCACCAATGACTCCTATGACCC | CGCAGTTGTCCGTGGCTCTCTTA |
|              | <i>Gapdh</i>  | GGGAAGCCCATCACCATCTT     | GCCTCACCCCATTTGATGTT    |
|              | <i>Actb</i>   | AATCGTGCGTGACATCAAAGAG   | GCCATCTCCTGCTCGAAGTC    |
|              | <i>Hprt</i>   | CGTGATTAGCGATGATGAACCA   | TCCAAATCCTCGGCATAATGA   |
|              | <i>Tuba1a</i> | GGTCCCAAAGATGTCAATGCT    | CAAACCTGGATGGTACGCTTGGT |
